# Supplementary material for: pH-responsive on-demand release of eugenol from metal–organic frameworks for synergistic bacterial killing
Source: Royal Society of Chemistry journal article supplement (doi:10.1039/d3dt04216b), 2024-01-01
Supplement: d3dt04216b1.pdf [file d3dt04216b1.pdf]

## Supporting Information

### **pH-responsive on-demand eugenol release from metal-organic framework for synergistic bacteria killing**

Jing Wang,<sup>†</sup> Lin Li,<sup>†</sup> Xingyu Hu, Lulu Zhou\* and Jing Hu\*

School of Chemical and Environmental Engineering, Shanghai Institute of Technology, Shanghai  
201418, P.R. China.

Email: [hujing@sit.edu.cn](mailto:hujing@sit.edu.cn), [zll@sit.edu.cn](mailto:zll@sit.edu.cn).

#### **Determination of standard curves for eugenol ethanol solutions**

Dissolve 0.1000 g of eugenol solution with a small amount of ethanol, transfer to a 100 mL of volumetric bottle, and dilute with ethanol solution until the concentration of eugenol solution is 1 mg mL<sup>-1</sup>. Absorb 10 mL of the 1 mg mL<sup>-1</sup> solution into a 100 mL of volumetric bottle and dilute it with ethanol solution until the concentration of eugenol solution is 0.1 mg mL<sup>-1</sup>. Five colorimetric tubes were taken and pipeted with 1.00, 2.00, 3.00, 4.00, 5.00 mL of eugenol solution (0.1 mg mL<sup>-1</sup>). The concentration of eugenol standard solution was 0.01, 0.02, 0.03, 0.04, 0.05 mg mL<sup>-1</sup> when ethanol was added to the 10 mL scale. The standard curve of eugenol was determined by UV-Vis measurements at 280 nm.

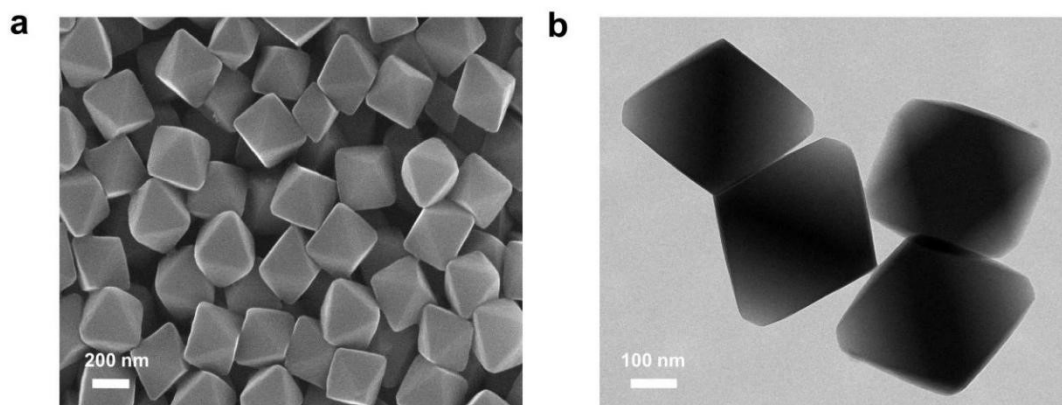

Fig. S1 (a) SEM image and (b) TEM image of B-UiO-66.

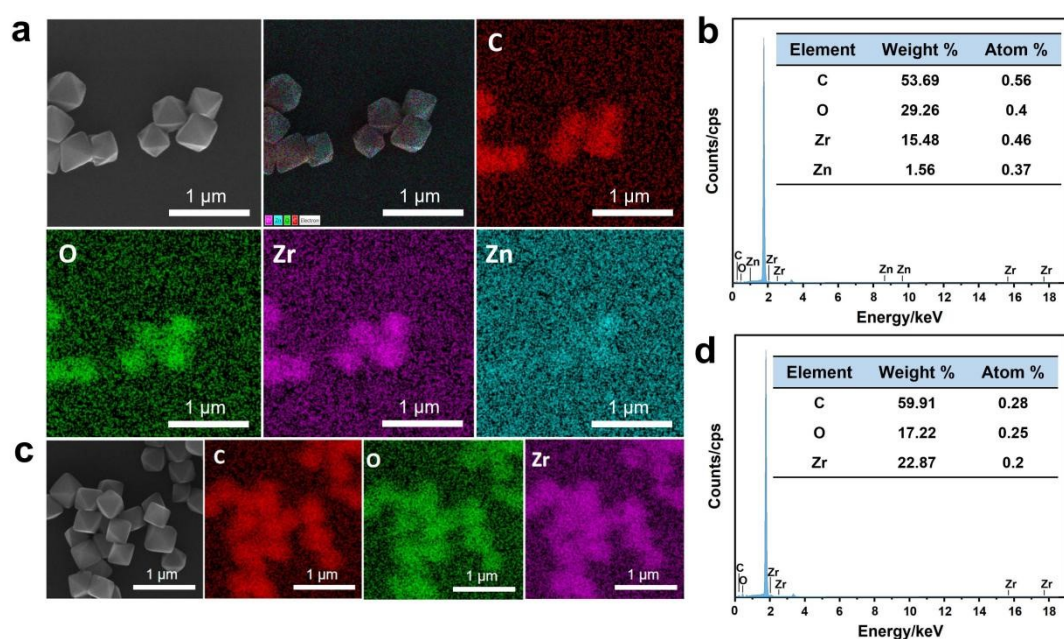

Fig. S2 Elemental mapping image of Eu@B-UiO-66/Zn (a) and B-UiO-66 (c); EDS spectra and the corresponding element distribution of Eu@B-UiO-66/Zn (b) and B-UiO-66 (d).

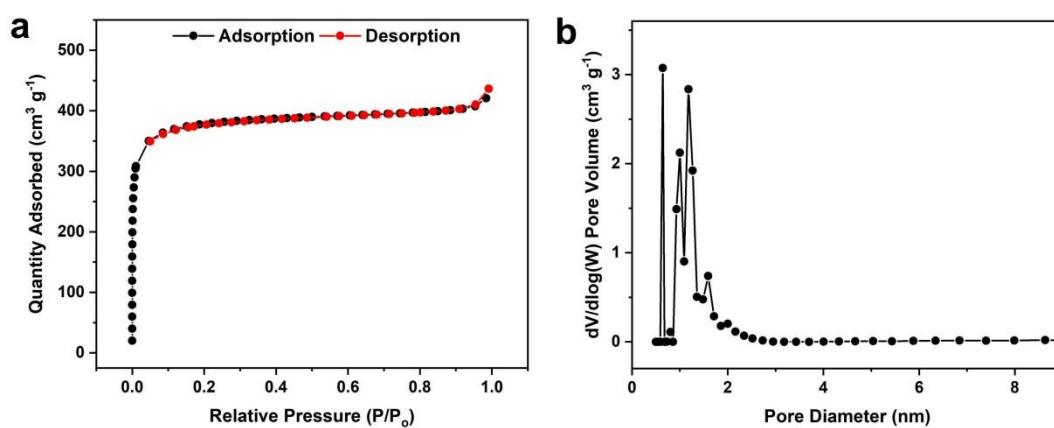

Fig. S3 (a) N<sub>2</sub> sorption isotherms and (b) pore-size distribution curves of B-UiO-66.

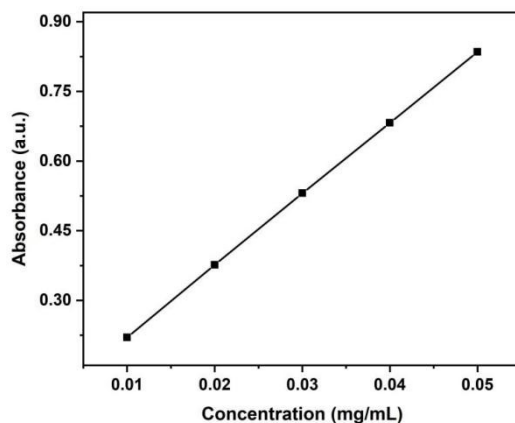

**Fig. S4** Standard curve of eugenol.

Note: The standard curve equation of eugenol:  $Y=15.153x+0.076$ ,  $R^2=0.9998$

Where, Y is the absorbance at 280 nm, and x is the concentration at this time ( $\text{mg mL}^{-1}$ ).

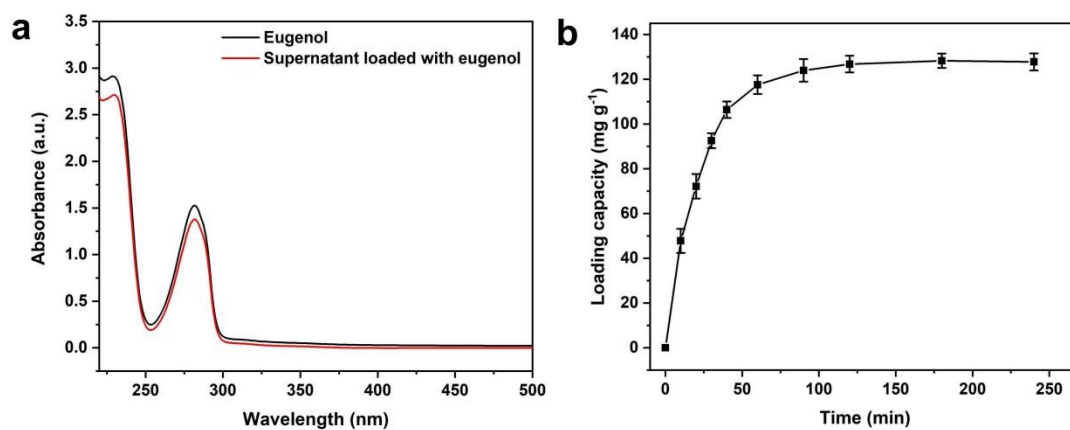

**Fig. S5** UV-Vis absorption spectra of eugenol and supernatant loaded with eugenol, (b) Loading capacity of B-UiO-66 for eugenol.

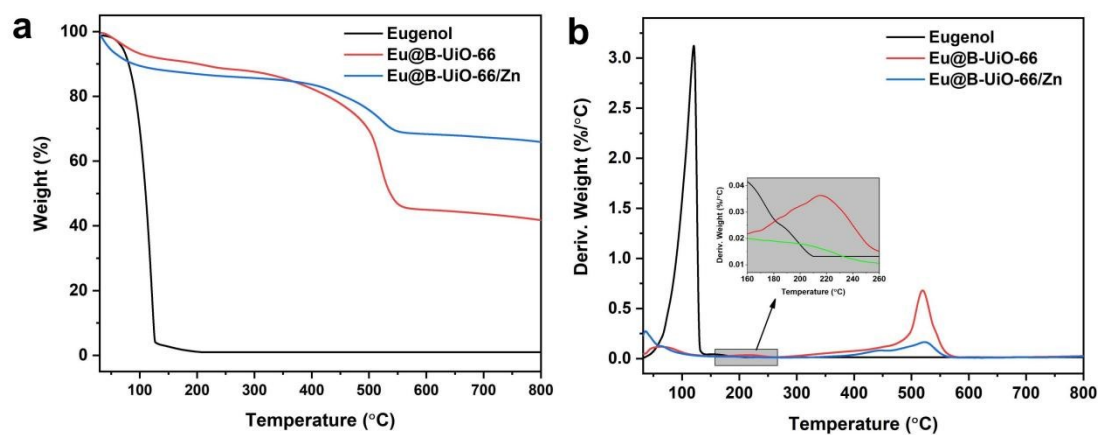

**Fig. S6** (a) TGA and (b) DTG curves of eugenol (black), Eu@B-UiO-66 (red) and Eu@B-UiO-66/Zn (blue).

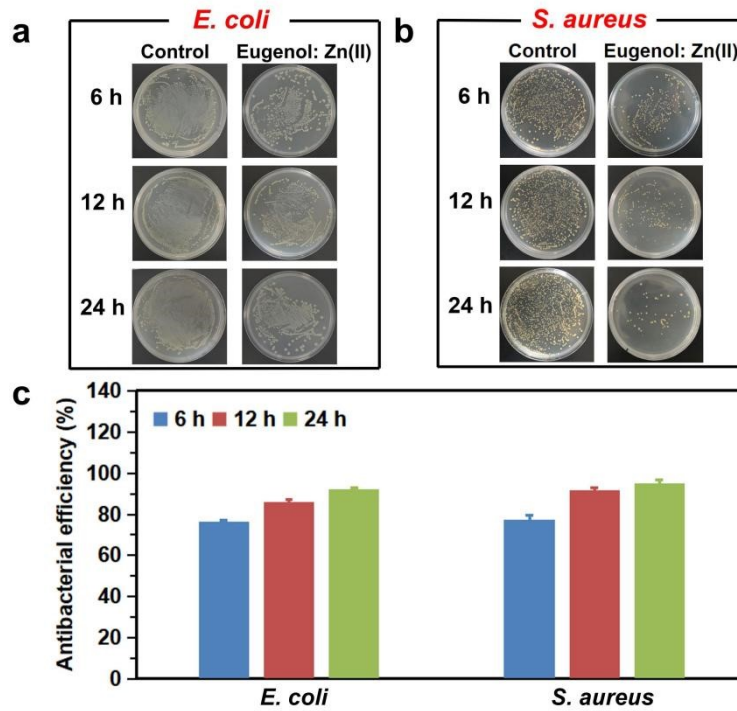

**Fig. S7** Bacterial colony images of *E. coli* (a) and *S. aureus* (b) at pH 6.8 for 24 h; quantitative data (c) of *E. coli* and *S. aureus*.

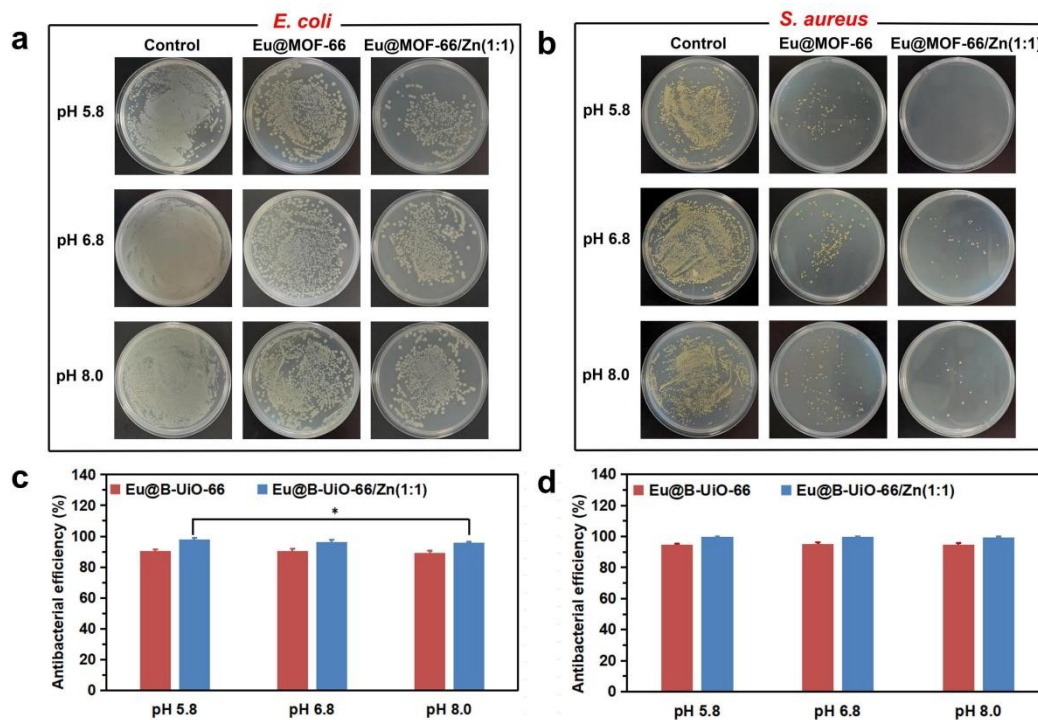

**Fig. S8** Bacterial colony images and quantitative data of *E. coli* (a, c) and *S. aureus* (b, d) at different pH for 24 h (n = 3, mean  $\pm$  SD, \*p < 0.05).
